# Supplementary material for: Structural insight for the recognition of G-quadruplex structure at human c-myc promoter sequence by flavonoid Quercetin
Source: PubMed Central journal article supplement (PMC5472631; doi:10.1038/s41598-017-03906-3), 2017-06-15

## Supplementary Information

# Structural insight for the recognition of G-quadruplex structure at human c-myc promoter sequence by flavonoid Quercetin.

Arpita Tawani<sup>a</sup>, Subodh Kumar Mishra<sup>a</sup> & Amit Kumar<sup>a\*</sup>

<sup>a</sup> Centre for Biosciences and Biomedical Engineering, Indian Institute of Technology, Indore.

Indore, 453552, Madhya Pradesh, India

E-mail: [amitk@iiti.ac.in](mailto:amitk@iiti.ac.in)

## Index

|                                                                                                                                                                              |         |
|------------------------------------------------------------------------------------------------------------------------------------------------------------------------------|---------|
| <b>SI. Supplementary Tables</b>                                                                                                                                              | S4-S9   |
| <b>Table S1a.</b> Binding constant values as obtained from fluorescence titration experiment for all flavonoids with <i>c-myc</i> DNA and CT- DNA.                           | S4      |
| <b>Table S1b.</b> Binding constant values as obtained from fluorescence titration experiment for Quercetin with Tel7 and c-kit G-quadruplex DNA.                             | S4      |
| <b>Table S2.</b> Life time fluorescence decay parameters for Quercetin and its D/N = 2:1 complex with <i>c-myc</i> DNA at 298 K.                                             | S5      |
| <b>Table S3a.</b> Thermodynamic and energetics data for the interaction Quercetin with <i>c-myc</i> DNA as obtained from ITC experiment.                                     | S5      |
| <b>Table S3b.</b> Thermodynamic and energetics data for the interaction all flavonoids with <i>c-myc</i> DNA as obtained from ITC experiment.                                | S5      |
| <b>Table S4.</b> The melting temperature values of Pu24T G-quadruplex DNA in absence and presence of Quercetin.0                                                             | S6      |
| <b>Table S5.</b> Proton chemical shift table for Pu24T- <i>c-myc</i> DNA and Quercetin complex at D/N = 2.0                                                                  | S7      |
| <b>Table S6.</b> Relative intensity of intermolecular NOE connectivity between Pu24T- <i>c-myc</i> DNA and Quercetin in the complex at D/N = 2.0 from NOESY spectra at 298K. | S8      |
| <b>Table S7.</b> Statistics of the solution structure of Quercetin- Pu24T- <i>c-myc</i> DNA complex.                                                                         | S9      |
| <b>Table S8.</b> Energy terms (kcal mol <sup>-1</sup> ) for starting structure and final rMD structure.                                                                      | S9      |
| <b>SII. Supplementary figures</b>                                                                                                                                            | S10-S20 |
| <b>Figure S1a.</b> Fluorescence titration curve of flavonoids as a function of Pu24T concentration.                                                                          | S10     |
| <b>Figure S1b.</b> Fluorescence titration curve of flavonoids as a function of c-kit21 and Tel-7 G-quadruplex DNA concentration.                                             | S11     |
| <b>Figure S2.</b> Fluorescence titration curve of flavonoids as a function of of CT-DNA concentration.                                                                       | S12     |
| <b>Figure S3.</b> Isothermal Titration Calorimetry (ITC) titration data for flavonoids binding to Pu24T at 25°C.                                                             | S13     |
| <b>Figure S4.</b> UV thermal denaturation profile of Pu24T G-quadruplex DNA in the absence and presence of Quercetin upto D/N = 2.0.                                         | S14     |

|                                                                                                                                                                                                |     |
|------------------------------------------------------------------------------------------------------------------------------------------------------------------------------------------------|-----|
| <b>Figure S5.</b> Expansion of NOESY spectra showing stacking interactions in base region for Quercetin and Pu24T- <i>c-myc</i> DNA as a function of ligand/DNA ratio upto D/N = 2.0 at 298 K. | S15 |
| <b>Figure S6.</b> Quercetin interacting with 5' G-tetrad of Pu24T G-quadruplex DNA via $\pi$ - $\pi$ stacking interactions.                                                                    | S16 |
| <b>Figure S7.</b> Quercetin interacting with 3' G-tetrad of Pu24T G-quadruplex DNA via $\pi$ - $\pi$ stacking interactions                                                                     | S16 |
| <b>Figure S8.</b> Quercetin interacting with Pu24T <i>c-myc</i> G-quadruplex DNA by formation of hydrogen bonds.                                                                               | S17 |
| <b>Figure S9.</b> Quercetin interacting with Pu24T <i>c-myc</i> G-quadruplex DNA by stacking above the A. top G-tetrad and B. below the bottom G-tetrad.                                       | S17 |
| <b>Figure S10.</b> Confocal images monitoring morphological changes in Quercetin treated HeLa cells as compared to untreated cells.                                                            | S18 |
| <b>Figure S11.</b> MTT assay plot for cytotoxicity of Quercetin on HEK cells.                                                                                                                  | S19 |
| <b>Figure S12.</b> Effect of Quercetin at various concentrations on <i>c-MYC</i> promoter activity.                                                                                            | S19 |

## SI. Supplementary Tables

**Table S1a.** The binding constant ( $K_d$ ,(M)) values of nine representative flavonoids with *c-myc* G-quadruplex DNA and CT-DNA.

| Flavonoids | Pu24T- <i>c-myc</i> DNA |                        | CT-DNA                 |
|------------|-------------------------|------------------------|------------------------|
|            | $K_d1$ (M)              | $K_d2$ (M)             | $K_d$ (M)              |
| Luteolin   | $1.50 \times 10^{-6}$   | $8.25 \times 10^{-5}$  | $2.65 \times 10^{-5}$  |
| Quercetin  | $1.38 \times 10^{-7}$   | $8.33 \times 10^{-6}$  | $4.26 \times 10^{-5}$  |
| Rutin      | $1.71 \times 10^{-5}$   | $13.11 \times 10^{-4}$ | $7.59 \times 10^{-5}$  |
| Kaempferol | $1.30 \times 10^{-6}$   | $2.69 \times 10^{-5}$  | $3.40 \times 10^{-6}$  |
| Puerarin   | $8.88 \times 10^{-5}$   | $8.88 \times 10^{-4}$  | $4.26 \times 10^{-5}$  |
| Hesperidin | $1.00 \times 10^{-6}$   | $9.63 \times 10^{-5}$  | $1.30 \times 10^{-5}$  |
| Myricetin  | $1.40 \times 10^{-6}$   | $1.40 \times 10^{-5}$  | $1.60 \times 10^{-6}$  |
| Daidzein   | $4.70 \times 10^{-5}$   | $4.70 \times 10^{-4}$  | $10.18 \times 10^{-6}$ |

**Table S1b.** The binding constant ( $K_d$ ,(M)) values of Quercetin *c-myc* G-quadruplex DNA and c-kit21up G-quadruplex DNA

| G-quadruplex DNA        | Quercetin             |                       |
|-------------------------|-----------------------|-----------------------|
|                         | $K_d1$ (M)            | $K_d2$ (M)            |
| Pu24T- <i>c-myc</i> DNA | $1.38 \times 10^{-7}$ | $8.33 \times 10^{-6}$ |
| c-ckit21up DNA          | $1.12 \times 10^{-6}$ | --                    |
| Tel7 DNA                | $2.13 \times 10^{-6}$ | --                    |

**Table S2.** Life time fluorescence decay parameters for Quercetin and its D/N = 2:1 complex with *c-myc* DNA at 298 K.

| Uncomplexed Quercetin |          |                       |                        |                       |           |          |                        | Pu24T - <i>c myc</i> -Quercetin complex D/N = 2.0 |          |          |                       |                       |           |          |                        |
|-----------------------|----------|-----------------------|------------------------|-----------------------|-----------|----------|------------------------|---------------------------------------------------|----------|----------|-----------------------|-----------------------|-----------|----------|------------------------|
| Life Time Decay (ns)  |          |                       | Amplitude              |                       |           | $\chi^2$ | Average life time (ps) | Life Time Decay (ns)                              |          |          | Amplitude             |                       |           | $\chi^2$ | Average life time (ps) |
| $\tau_1$              | $\tau_2$ | $\tau_3$              | $\beta_1$              | $\beta_2$             | $\beta_3$ |          |                        | $\tau_1$                                          | $\tau_2$ | $\tau_3$ | $\beta_1$             | $\beta_2$             | $\beta_3$ |          |                        |
| 5.23                  | 62.95    | $7.36 \times 10^{-2}$ | $-3.39 \times 10^{-2}$ | $9.15 \times 10^{-3}$ | 806138.8  | 1.96     | 1.02                   | 59.10                                             | 277.44   | 1.27     | $7.05 \times 10^{-3}$ | $8.40 \times 10^{-4}$ | 1.14      | 2.38     | 25.42                  |

**Table S3a.** Thermodynamic and energetics data for the interaction Quercetin with *c-myc* DNA as obtained from ITC experiment.

| Parameters  | Values                                      |
|-------------|---------------------------------------------|
| N1          | $0.415 \pm 0.05$ Sites                      |
| K1          | $1.57 \times 10^7 \pm 2.14$ M <sup>-1</sup> |
| $\Delta H1$ | $-1.86 \pm 284$ kcal/mol                    |
| $\Delta S1$ | 26.7 cal/mol/deg                            |
| N2          | $1.54 \pm 0.14$ Sites                       |
| K2          | $8.50 \times 10^5 \pm 1.54$ M <sup>-1</sup> |
| $\Delta H2$ | $-0.59 \pm 179$ kcal/mol                    |
| $\Delta S1$ | 25.1 cal/mol/deg                            |

**Table S3b.** Thermodynamic and energetics data for the interaction flavonoids with *c-myc* DNA as obtained from ITC experiment.

| Flavonoids | N1 (Sites)       | N2 (Sites)        | K1                                          | K2                                          |
|------------|------------------|-------------------|---------------------------------------------|---------------------------------------------|
| Luteolin   | $0.49 \pm 78$    | $0.90 \pm 6.55$   | $13.2 \times 10^4 \pm 3.76$ M <sup>-1</sup> | $0.00170 \pm 2.93$ M <sup>-1</sup>          |
| Rutin      | $0.32 \pm 0.34$  | $34.80 \pm 3.27$  | $7.23 \times 10^5 \pm 8.60$ M <sup>-1</sup> | $650 \pm 8.43$ M <sup>-1</sup>              |
| Kaempferol | $1.15 \pm 2.45$  | $0.242 \pm 160$   | $2.09 \pm 4.4$ M <sup>-1</sup>              | $1.34 \times 10^5 \pm 3.81$ M <sup>-1</sup> |
| Puerarin   | $0.224 \pm 50.4$ | $0.432 \pm 0.191$ | $1.10 \times 10^4 \pm 7.75$ M <sup>-1</sup> | $4.48 \times 10^{17}$ M <sup>-1</sup>       |
| Hesperidin | $2.18 \pm 4.74$  | $0.201 \pm 2.84$  | $7.35 \times 10^5 \pm 1.06$ M <sup>-1</sup> | $6.04 \times 10^5 \pm 4.07$ M <sup>-1</sup> |
| Myricetin  | $0.34 \pm 0.285$ | $2.05 \pm 0.00$   | $1.65 \times 10^5 \pm 0$ M <sup>-1</sup>    | $1.58 \times 10^4 \pm 4.60$ M <sup>-1</sup> |
| Daidzein   | $1.39 \pm 9.57$  | $2.28 \pm 1.07$   | $3.34 \times 10^5 \pm 1.50$ M <sup>-1</sup> | $2.93 \times 10^5 \pm 1.01$ M <sup>-1</sup> |

**Table S4.** The melting temperature values of Pu24T G-quadruplex DNA in absence and presence of Quercetin.

| <b>D/N</b> | <b>Temperature (°C)</b> |
|------------|-------------------------|
| 0.0        | 70.0                    |
| 1.0        | 78.0                    |
| 2.0        | 80.3                    |

**Table S5.** Proton chemical shift table for Pu24T-*c-myc* DNA and Quercetin complex at D/N = 2.0.

|            | <b>NH/H1</b> | <b>H8/H6</b> | <b>H1'</b> | <b>H2'</b> | <b>H2''</b> | <b>H3'</b> | <b>H71/72/73</b> |
|------------|--------------|--------------|------------|------------|-------------|------------|------------------|
| <b>T1</b>  | -            | -            | -          | -          | -           | -          | -                |
| <b>G2</b>  | -            | 8.057        | -          | -          | -           | -          | -                |
| <b>A3</b>  | -            | 7.684        | 6.471      | 2.894      | 2.817       | -          | -                |
| <b>G4</b>  | 11.758       | 8.014        | -          | -          | -           | -          | -                |
| <b>G5</b>  | 11.206       | 7.957        | 5.861      | -          | -           | -          | -                |
| <b>G6</b>  | 10.920       | 7.894        | 5.761      | 2.481      | 2.641       | 4.048      | -                |
| <b>T7</b>  | -            | 7.915        | 5.508      | -          | -           | -          | -                |
| <b>G8</b>  | 11.510       | 7.718        | 6.328      | -          | -           | -          | -                |
| <b>G9</b>  | 11.529       | 7.212        | 5.891      | 2.534      | 2.077       | 4.540      | -                |
| <b>T10</b> | -            | 7.392        | -          | -          | -           | -          | -                |
| <b>G11</b> | 11.529       | 7.502        | 5.463      | 2.660      | 2.307       | 4.167      | -                |
| <b>A12</b> | -            | 7.555        | 6.150      | 2.627      | 2.875       | 4.240      | -                |
| <b>G13</b> | 11.675       | 7.93         | 6.549      | 2.708      | 2.523       | 4.044      | -                |
| <b>G14</b> | 11.212       | 7.760        | 5.887      | 2.536      | 2.002       | 4.538      | -                |
| <b>G15</b> | 11.161       | 7.232        | 5.946      | -          | -           | -          | -                |
| <b>T16</b> | -            | -            | -          | -          | -           | -          | -                |
| <b>G17</b> | 11.133       | 7.861        | 5.704      | -          | -           | -          | -                |
| <b>G18</b> | 11.422       | 7.646        | 5.955      | 2.395      | 2.716       | 4.178      | -                |
| <b>G19</b> | 10.731       | 7.464        | 5.596      | -          | -           | -          | -                |
| <b>G20</b> | 10.852       | 7.182        | 5.786      | -          | -           | -          | -                |
| <b>A21</b> | -            | 8.122        | 6.381      | -          | -           | -          | -                |
| <b>A22</b> | -            | 8.151        | 6.205      | 2.345      | 2.522       | 3.542      | -                |
| <b>G23</b> | -            | 7.539        | 5.712      | -          | -           | -          | -                |
| <b>G24</b> | 11.506       | 7.561        | 5.930      | -          | -           | -          | -                |

**Table S6.** Relative intensity of intermolecular NOE connectivity between Pu24T and Quercetin in the complex at D/N=2.0 from NOESY spectra at 298K.

| <b>S.No.</b> | <b>NOE restraints</b> | <b>Input Range</b> | <b>Input Distance</b> | <b>Output Distance (2N6C)</b> |
|--------------|-----------------------|--------------------|-----------------------|-------------------------------|
| 1            | A22:H8-Que:H8         | m/w                | 3.5                   | 4.8                           |
| 2            | G13:H8-Que:H8         | m                  | 4.9                   | 5.3                           |
| 3            | G19:H8-Que:H8         | s                  | 4.3                   | 5.4                           |
| 4            | G23:H8-Que:H8         | ss                 | 2.1                   | 3.3                           |
| 5            | G2:H8-Que:H8          | m                  | 3.1                   | 3.8                           |
| 6            | G6:H8-Que:H8          | m                  | 4.2                   | 5.1                           |
| 7            | G17:NH-Que:H8         | ss                 | 2.8                   | 3.5                           |
| 8            | G15:NH-Que:H8         | s                  | 3.0                   | 3.6                           |
| 9            | G19:NH-Que:H6'        | m                  | 4.8                   | 5.1                           |
| 10           | G13:H1'-Que:H6'       | m                  | 3.4                   | 4.1                           |
| 11           | G24:H1'-Que:H6'       | m                  | 3.3                   | 4.1                           |
| 12           | G6NH-Que:H6'          | s                  | 2.8                   | 3.2                           |
| 13           | G4:H8-Que:H6'         | m                  | 3.1                   | 3.7                           |



**Table S7.** Statistics of the solution structure of Quercetin- Pu24T complex.

| <b>NMR distance</b>                    | <b>Nucleic acid/ligand</b> |
|----------------------------------------|----------------------------|
| <b>Distance restraints</b>             |                            |
| Total NOE                              | 428                        |
| Intra-residue                          | 317                        |
| Inter-residue                          | 98                         |
| NOE- derived distance restraints       | 13                         |
| Hydrogen bonds                         | 154                        |
| <b>Structural Statistics</b>           |                            |
| <b>Violations (mean and SD)</b>        |                            |
| Number (> 0.2 Å)                       | 0.0                        |
| Maximum violations (Å)                 | 0.158 ± 0.026              |
| Distance constraints (Å)               | 0.044 ± 0.019              |
| Dihedral angle constraints (°)         | 0.090 ± 0.10               |
| <b>Average pairwise r.m.s.d.** (Å)</b> |                            |
| All nucleotides                        | 0.9976 ± 0.11              |
| All heavy atoms                        | 0.5964 ± 0.16              |

**Table S8.** Energy terms (kcal mol<sup>-1</sup>) for starting structure and final rMD structure.

| <b>Structure</b> | <b>Potential energy<br/>(kcal mol<sup>-1</sup>)</b> | <b>Van der Waals<br/>Energy<br/>(kcal mol<sup>-1</sup>)</b> | <b>Electrostatic<br/>Energy<br/>(kcal mol<sup>-1</sup>)</b> |
|------------------|-----------------------------------------------------|-------------------------------------------------------------|-------------------------------------------------------------|
| <b>Initial</b>   | 4.46 × 10 <sup>11</sup>                             | 1664.30                                                     | -15813.47                                                   |
| <b>Final</b>     | -18685.50                                           | -14891.95                                                   | -14908.78                                                   |

## SII. Supplementary Figures

**Figure S1a.** Fluorescence titration curve of all the eight flavonoids except Genistein; as a function of Pu24T-*c-myc* G-quadruplex DNA concentration. Solid lines represent fit according to the ligand binding two site saturation.

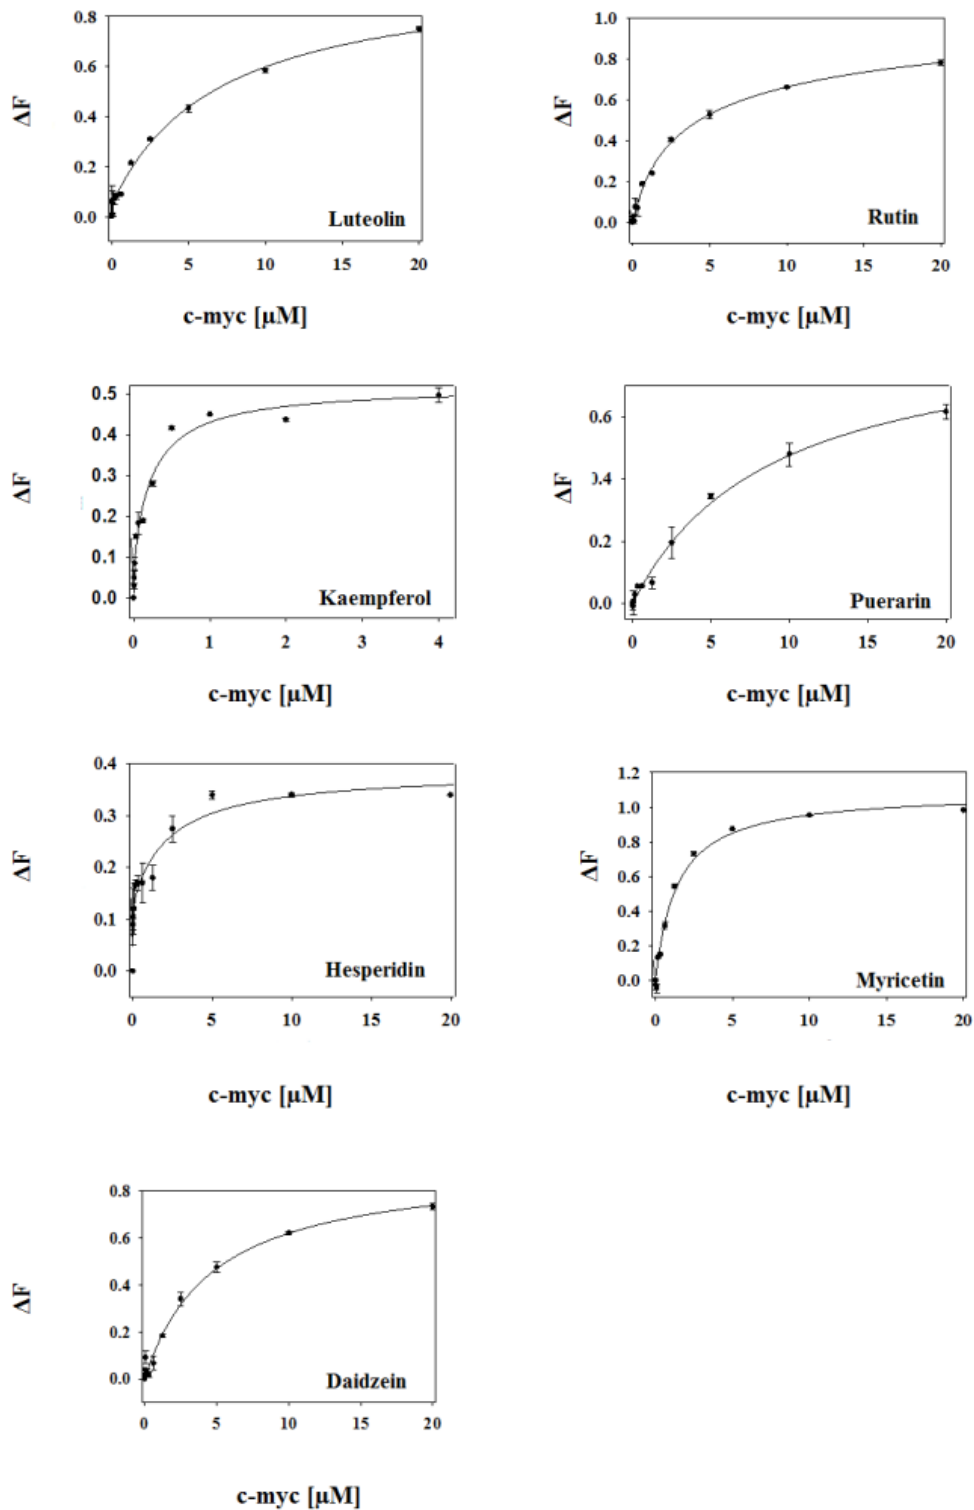

**Figure S1b.** Fluorescence titration curve of Quercetin as a function of: (a) c-kit21up G-quadruplex DNA concentration and (b) Tel7 (in presence of Na<sup>+</sup> ions) DNA concentration. Solid lines represent fit according to the ligand binding single site and two saturation.

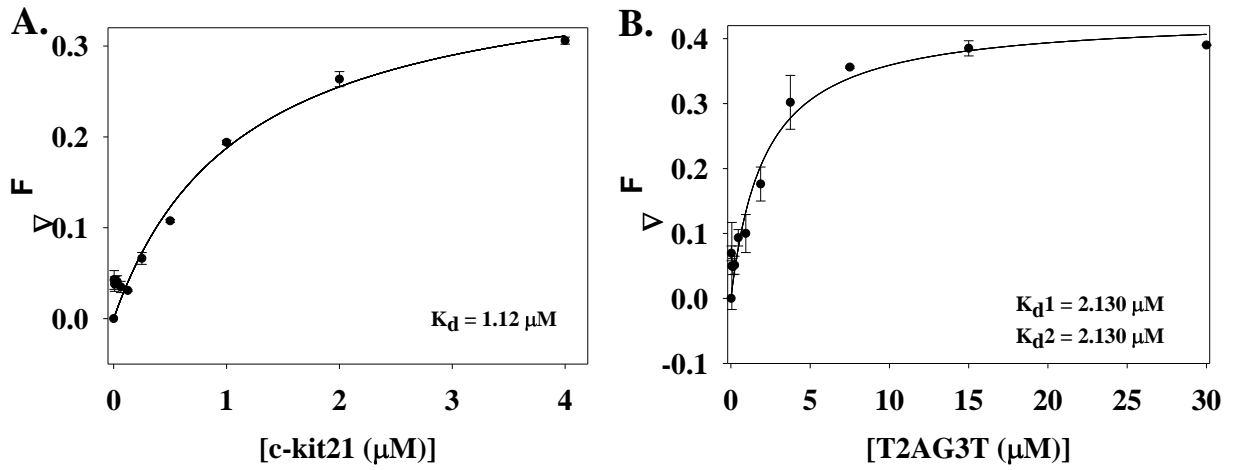

**Figure S2.** Fluorescence titration curve of all the eight flavonoids except Genistein; as a function of CT-DNA concentration. Solid lines represent best fit according to the ligand binding one/ two site saturation.

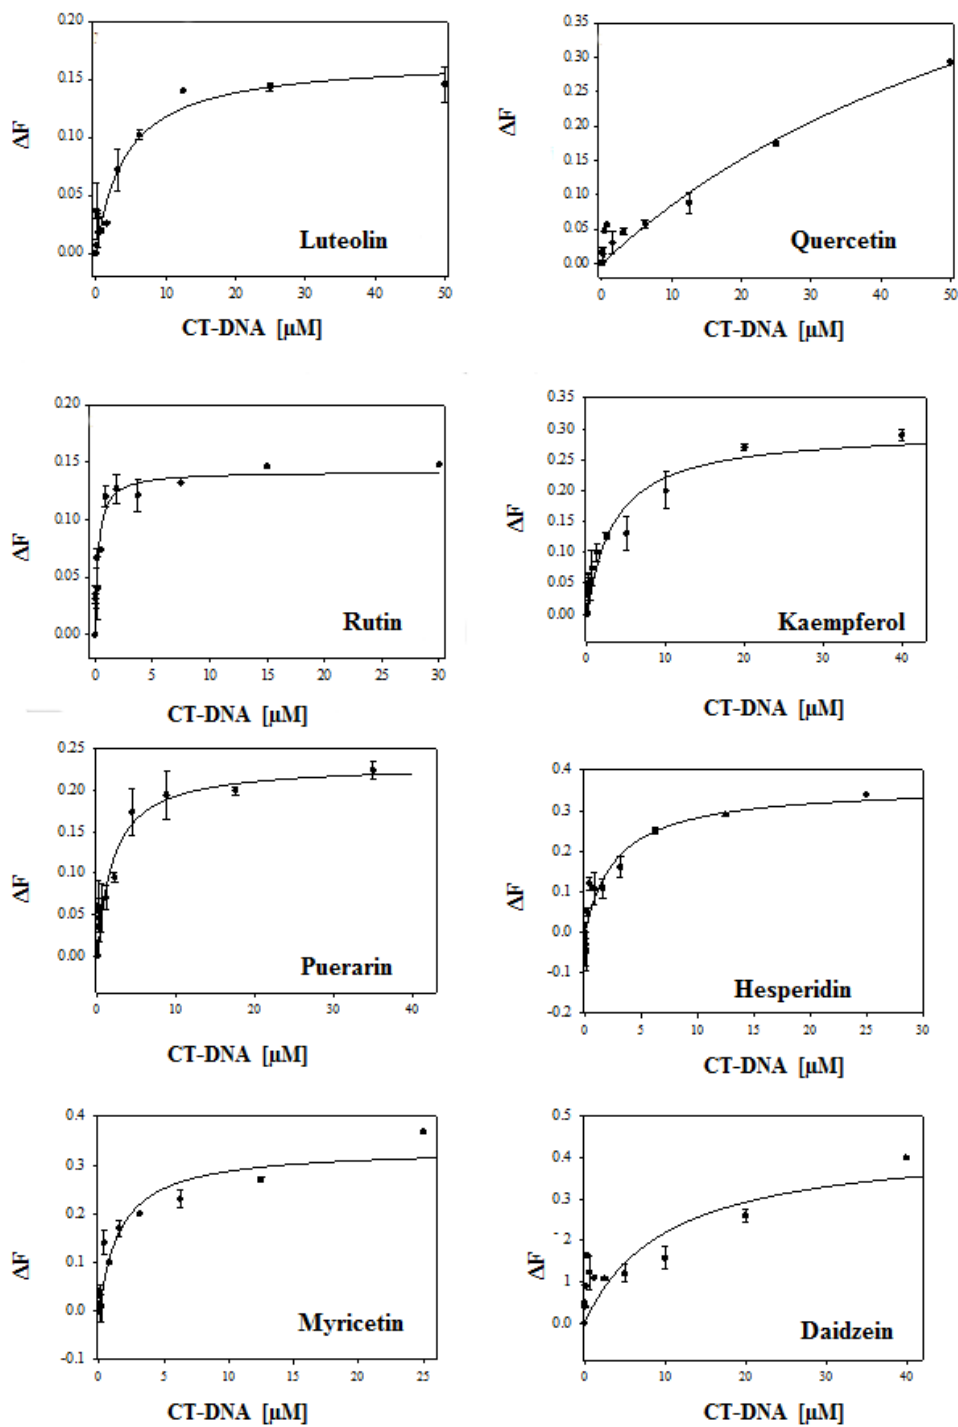

**Figure S3.** Isothermal Titration Calorimetry (ITC) titration data (points) for flavonoids binding to Pu24T at 25°C. Solid line represents the fitted data results from two site binding mode

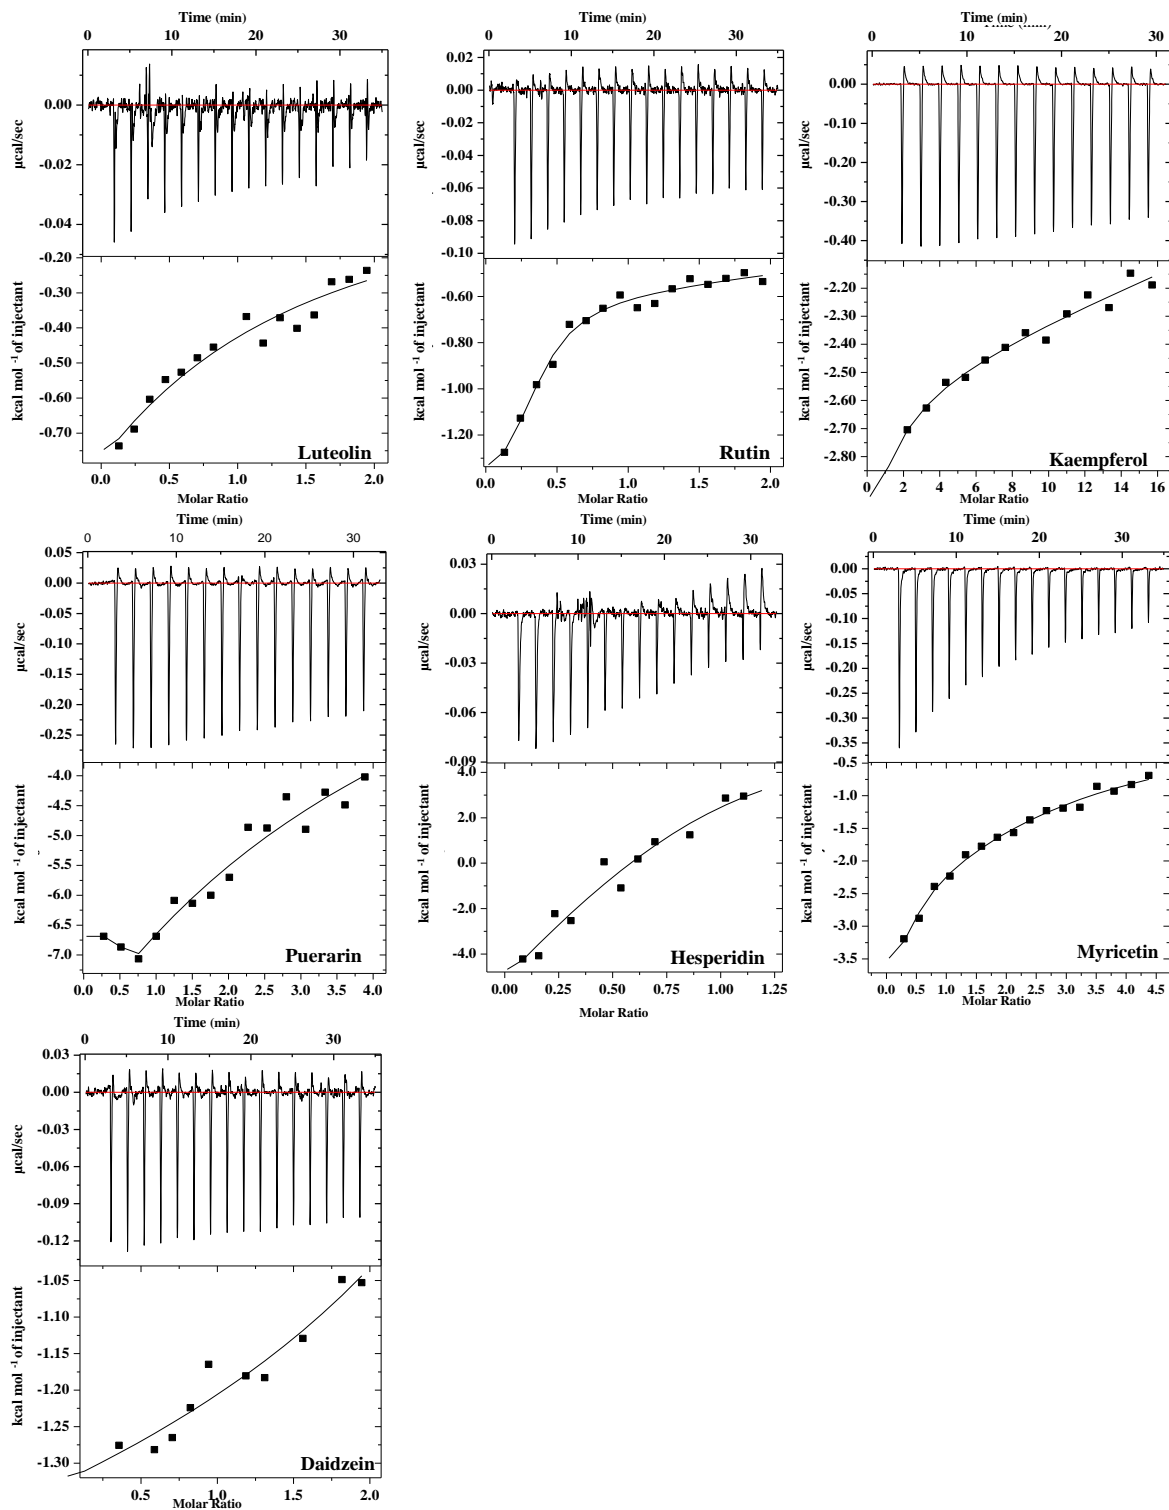

**Figure S4.** UV thermal denaturation profile of Pu24T G-quadruplex DNA in the absence and presence of Quercetin upto D/N = 2.0.

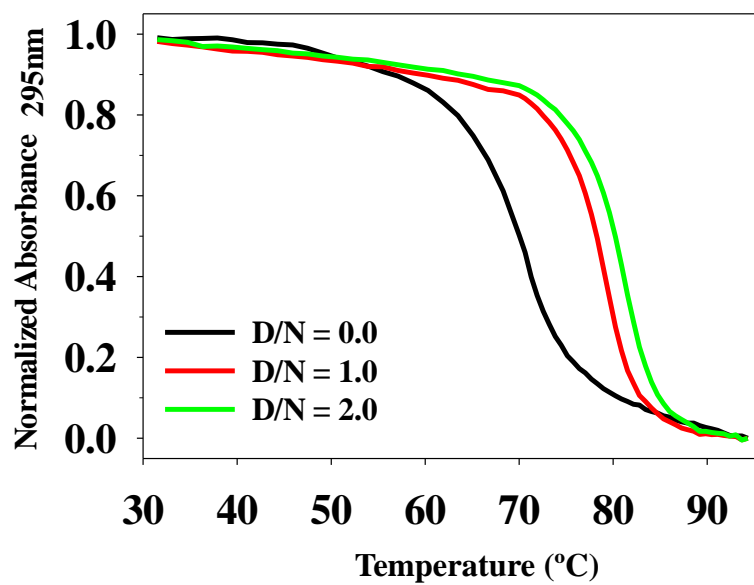

**Figure S5.** Expansion of NOESY spectra showing stacking interactions in base region for Quercetin and Pu24T-*c-myc* DNA as a function of ligand/DNA ratio upto **A.** D/N = 0.0 **B.** D/N = 2.0 at 298 K.

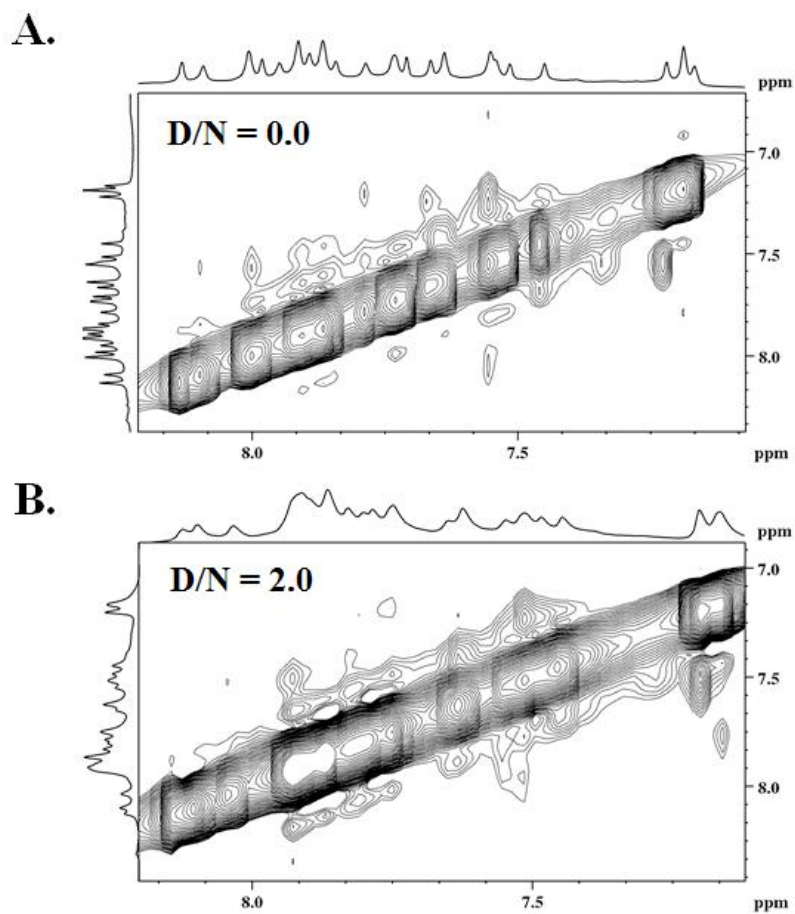

**Figure S6.** Quercetin interacting with Pu24T *c-myc* G-quadruplex DNA via  $\pi$ - $\pi$  stacking interaction with 5' G-tetrad: A. top view B. side view.

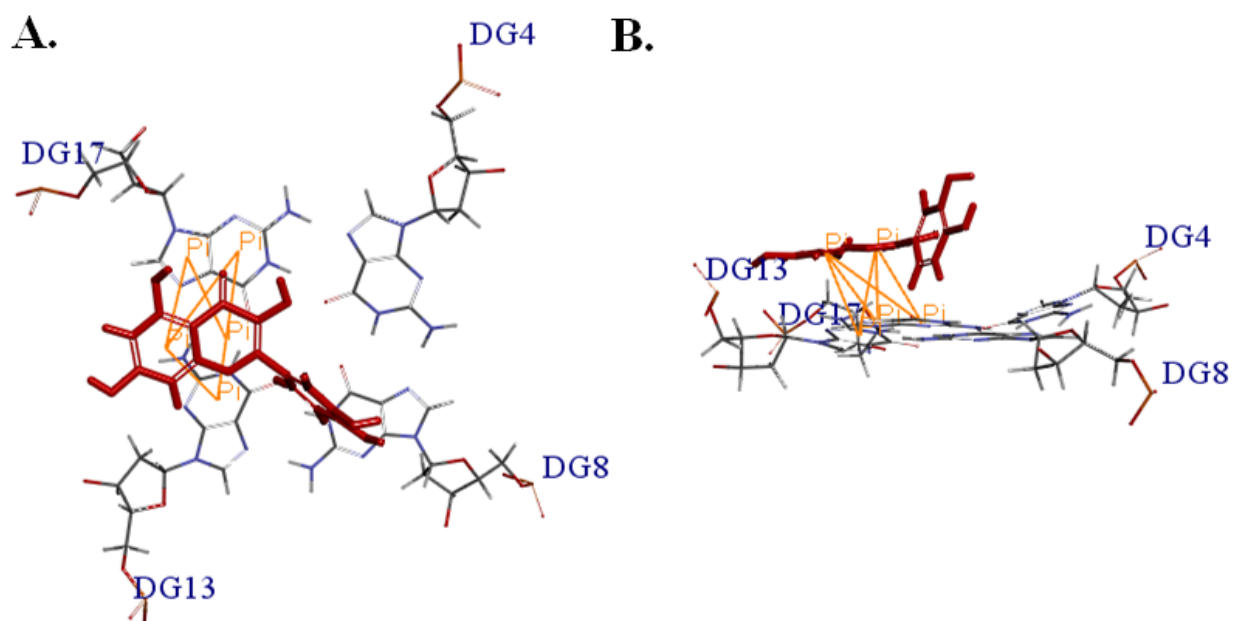

**Figure S7.** Quercetin interacting with Pu24T G-quadruplex DNA via  $\pi$ - $\pi$  stacking interaction with 3' G-tetrad: A. top view B. side view.

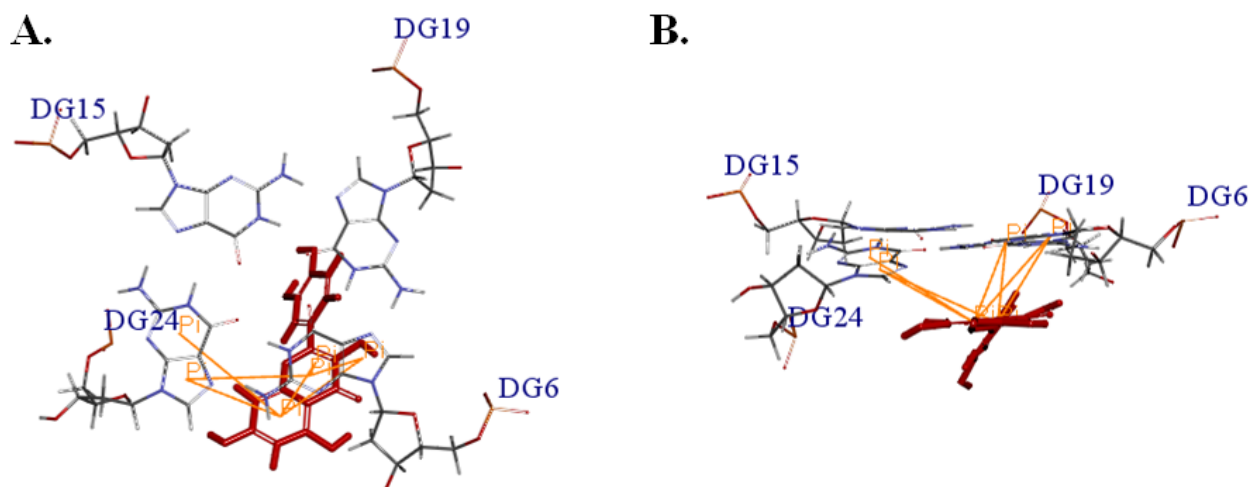



**Figure S8.** Quercetin interacting with Pu24T G-quadruplex DNA by formation of hydrogen bonds with: A. G-20 B. A12

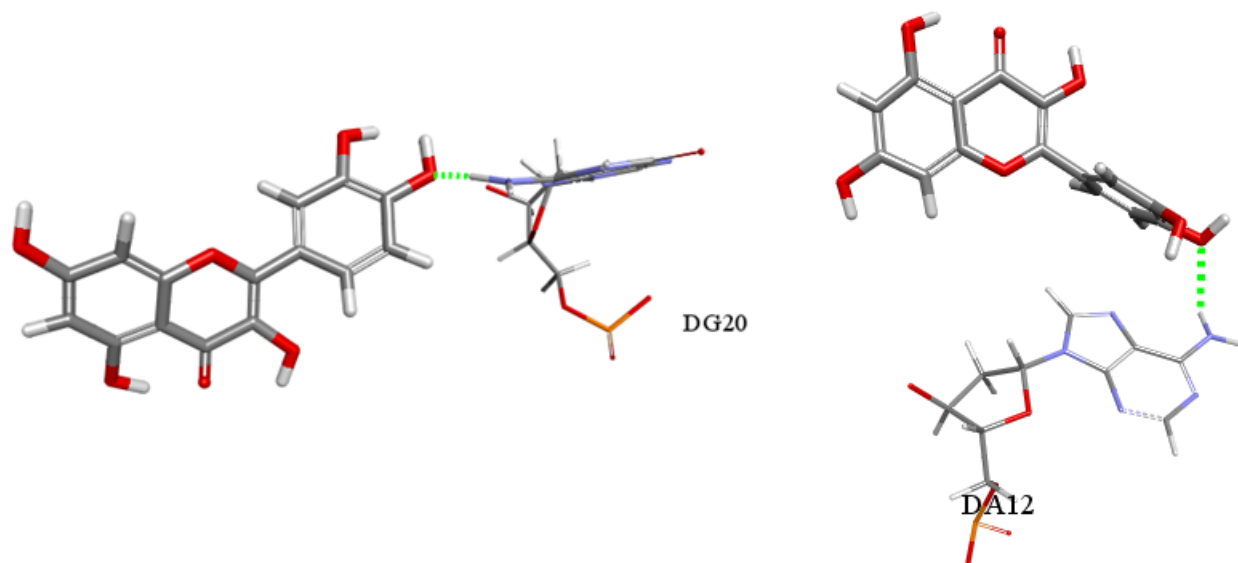

**Figure S9.** Quercetin interacting with Pu24T *c-myc* G-quadruplex DNA by stacking above the A. top G-tetrad and B. below the bottom G-tetrad.

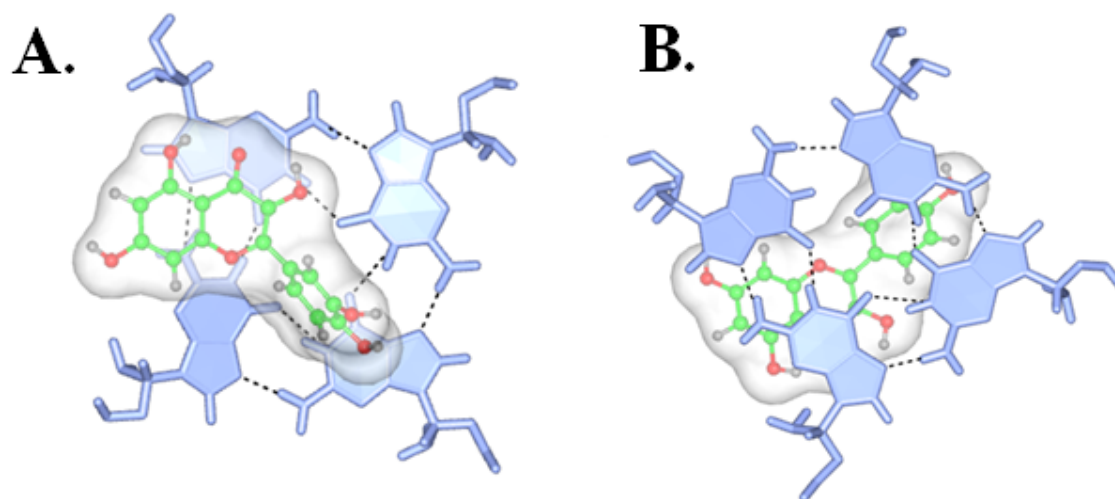

**Figure S10.** Upper panel shows morphological changes in Quercetin treated HeLa cells as compared to control cells monitored under phase contrast microscope. Middle panel shows confocal images of control HeLa cells stained with DAPI. Lower panel shows confocal Microscope images showing localization of Quercetin inside nucleus of the cell detected by its autofluorescence. Bottom right is the merged image of Quercetin treated cells stained with DAPI.

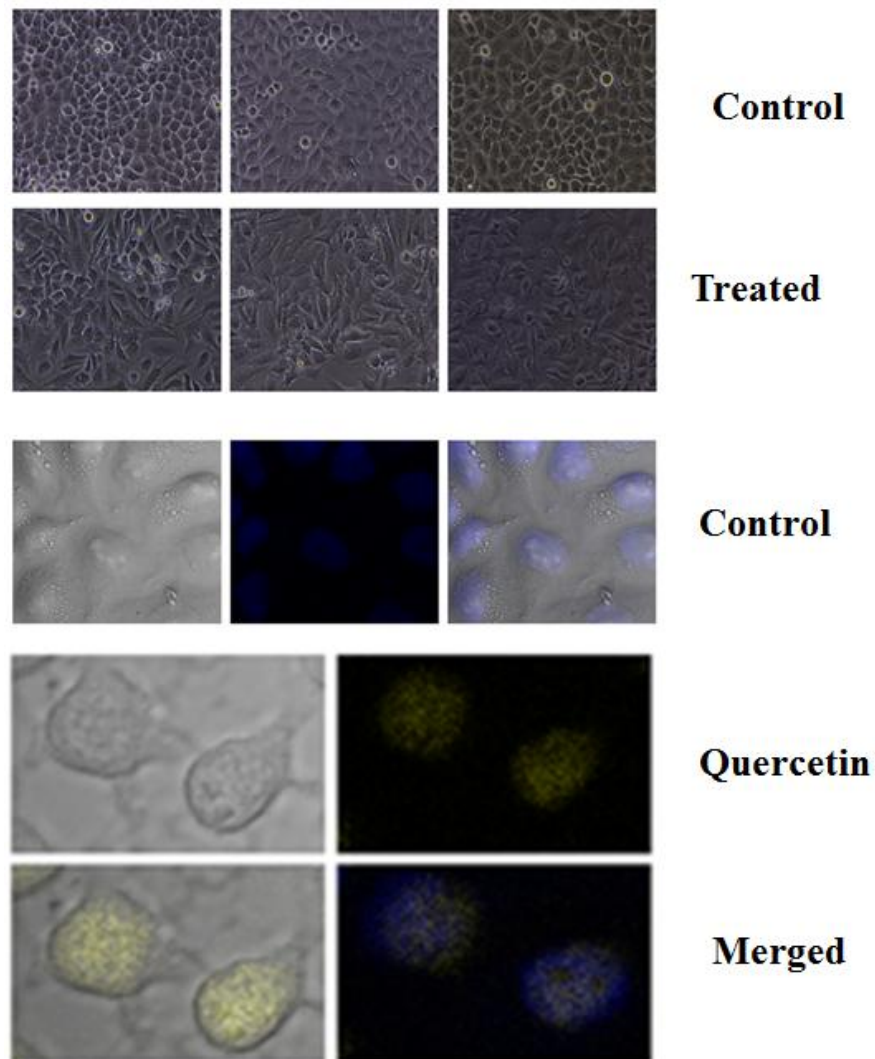

**Figure S11.** HEK cells were exposed to Quercetin at different concentration as indicated. Cell viability was measured by MTT assay after 48 h.

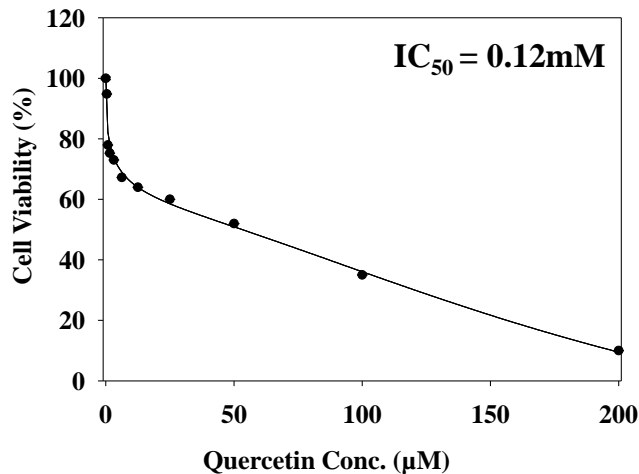

**Figure S12.** Effect of Quercetin at various concentrations on *c-MYC* promoter activity.

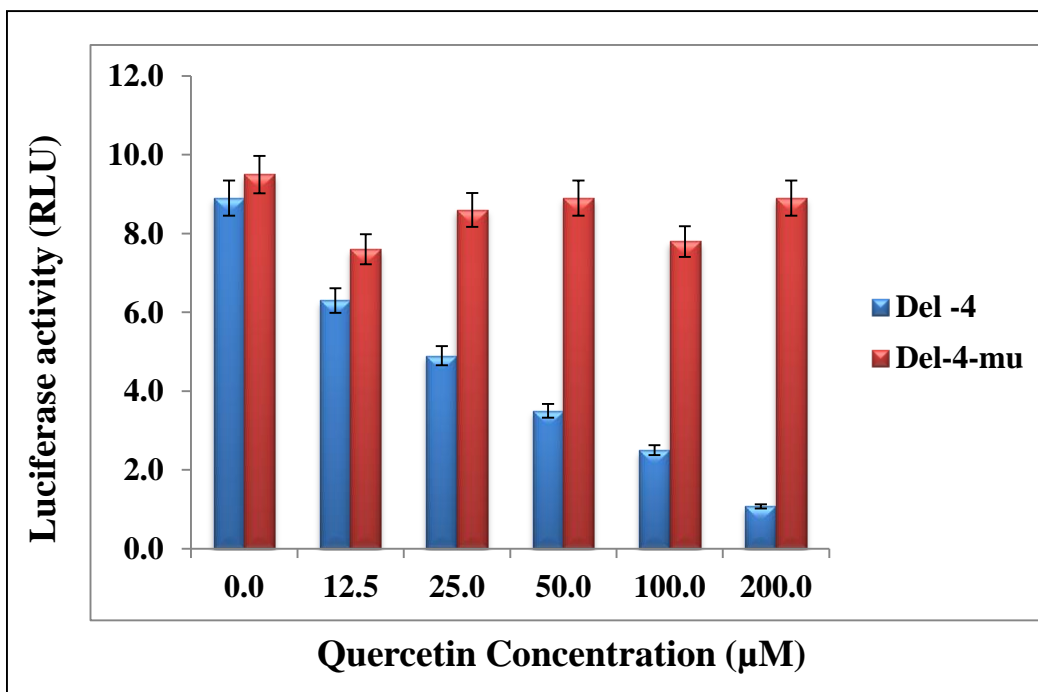

**Figure S13.** Representation of full gel image for semi-quantitative PCR of Quercetin treated cells

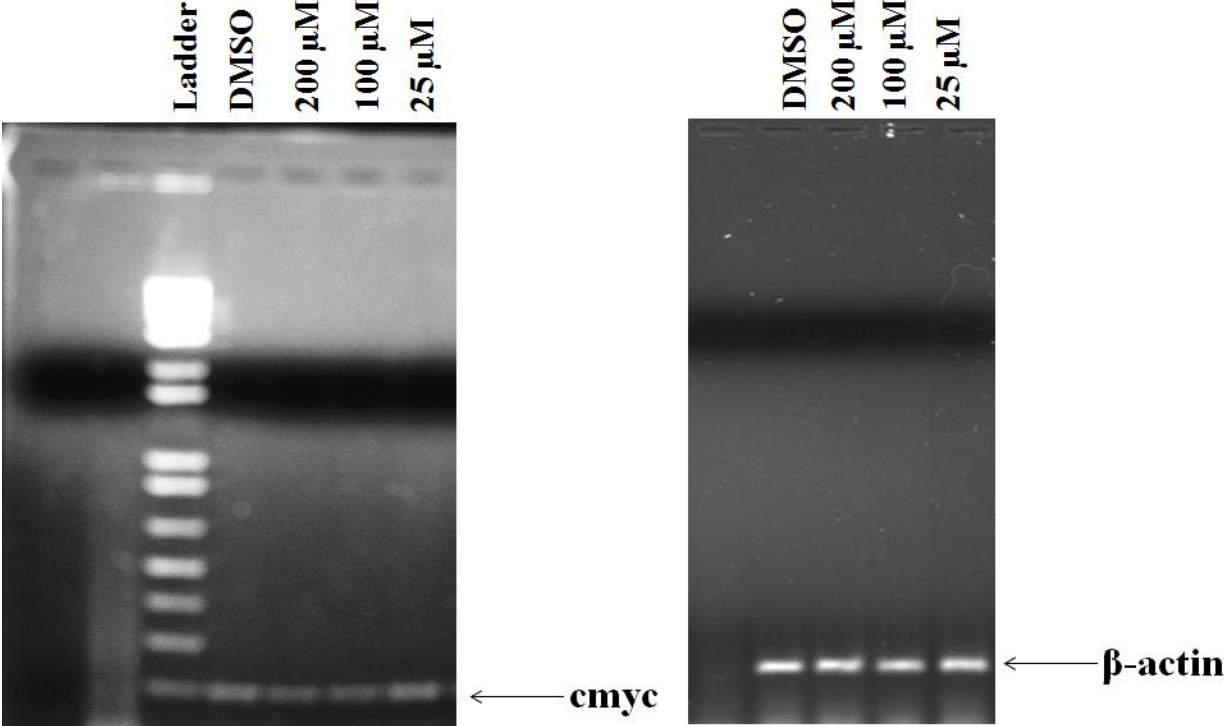

Supplement: 41598_2017_3906_MOESM1_ESM.pdf [file 41598_2017_3906_MOESM1_ESM.pdf]
